# Supplementary material
Source: Springer Nature journal article supplement (https://www.springermedizin.de/resource/supplementary/12981_2014_308_MOESM1_ESM.pdf/9603566)
Supplement: MOESM1 [file 9603566]

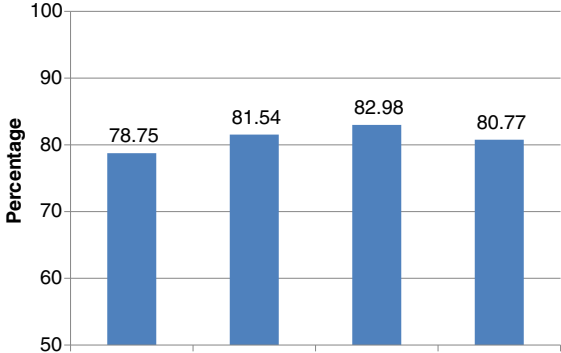

Time from ART regimen switch: 6 months 12 months 24 months 36 months

# patients with viral load <400 c/ml 63 53 39 21

Total # patients on followup 80 65 47 26
